# Supplementary material
Source: MDPI journal article supplement (https://www.mdpi.com/2297-8739/10/9/487)
Supplement: s1 [file s1]

# Shaping of HKUST-1 via Extrusion for the Separation of CO<sub>2</sub>/CH<sub>4</sub> in Biogas

Muhamad Tahriri Rozaini <sup>1,2</sup>, Denys I. Grekov <sup>2</sup>, Mohamad Azmi Bustam <sup>1,\*</sup> and Pascaline Pré <sup>2,\*</sup>

<sup>1</sup> Centre of Research in Ionic Liquids, CORIL, Chemical Engineering Department, Universiti Teknologi Petronas, 32610 Bandar Seri Iskandar, Perak, Malaysia;

<sup>2</sup> IMT Atlantique, GEPEA UMR-CNRS 6144, 44307 Nantes, France;

\* Correspondence: azmibustam@utp.edu.my (M.A.B.); pascaline.pre@imt-atlantique.fr (P.P.)

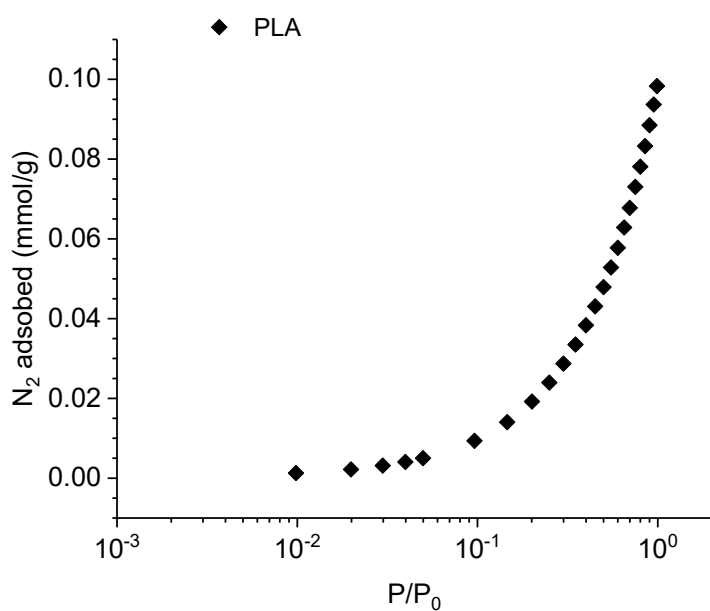

**Figure S1.** N<sub>2</sub> adsorption isotherm plot for PLA.

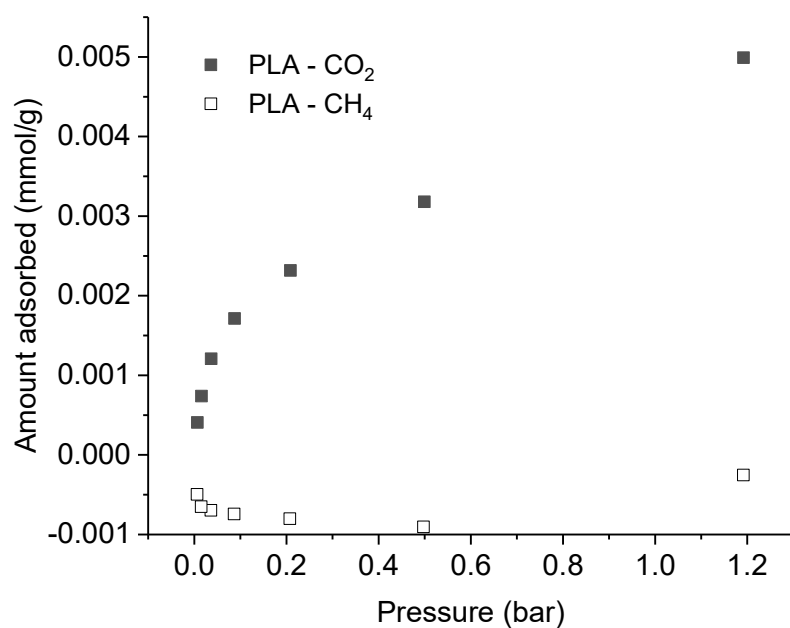

**Figure S2.** Gravimetric adsorption isotherms of CO<sub>2</sub> and CH<sub>4</sub> on PLA.

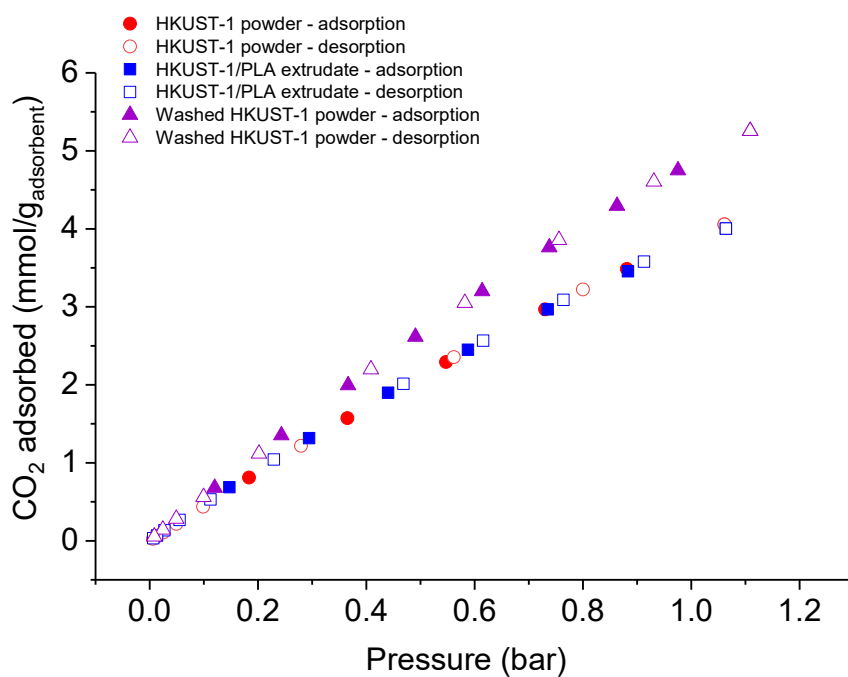

**Figure S3.** Gravimetric adsorption-desorption isotherms of CO<sub>2</sub> on HKUST-1 powder, HKUST-1/PLA extrudate and washed HKUST-1 powder.

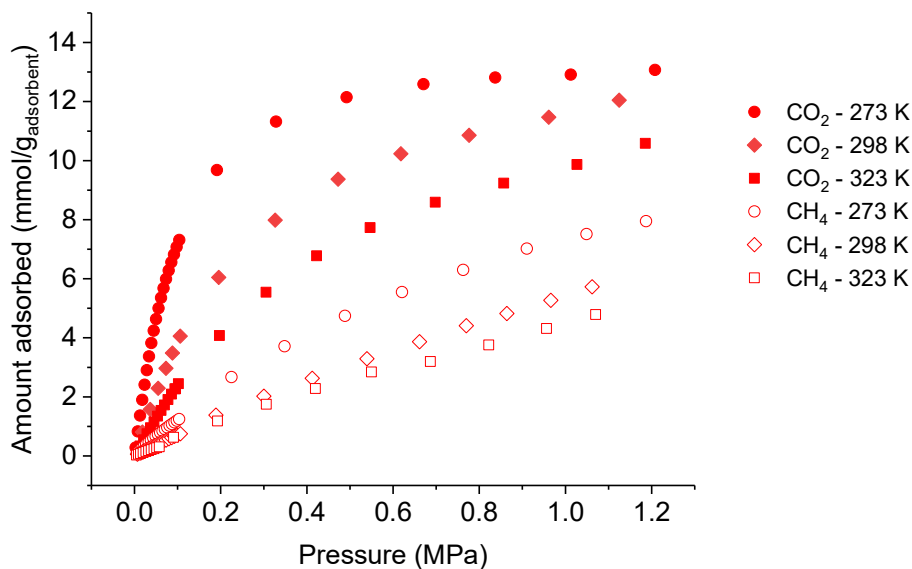

**Figure S4.** Gravimetric adsorption isotherms of CO<sub>2</sub> and CH<sub>4</sub> for HKUST-1/PLA extrudate at 273 K, 298K and 323 K.

**Table S1.** BET Surface area, pore volume of PLA.

| Sample | S <sub>BET</sub> (m <sup>2</sup> /g) | Micropore volume<br>(cm <sup>3</sup> /g), <sup>a)</sup> | Total pore volume<br>(cm <sup>3</sup> /g), <sup>b)</sup> |
|--------|--------------------------------------|---------------------------------------------------------|----------------------------------------------------------|
| PLA    | 9                                    | 0                                                       | 0                                                        |

<sup>a)</sup> Micropore volume determined by applying t-plot method on N<sub>2</sub> adsorption data <sup>b)</sup> Total pore volumes were calculated from experimental N<sub>2</sub> sorption data at p/p<sup>0</sup>= 0.98
